# Supplementary material for: Topical Application of Glycolipids from Isochrysis galbana Prevents Epidermal Hyperplasia in Mice
Source: MDPI journal article supplement (doi:10.3390/md16010002), 2017-12-25
Supplement: s1 [file s1]

**Supplementary Table 1.** Viability of HaCaT human keratinocytes treated with different concentrations of **MGMG-A** and **MGDG** fraction isolated from the microalgae *Isochrysis galbana*. Values are mean  $\pm$  ES (%) of three independent experiments (N = 3).

|                           | % Viability HaCaT keratinocytes (24 h) |                |                 |                 |                 |
|---------------------------|----------------------------------------|----------------|-----------------|-----------------|-----------------|
|                           | 5                                      | 10             | 30              | 50              | 100             |
| <b>MGMG-A</b> ( $\mu$ M)  | 97.56 $\pm$ 2.4                        | 98.6 $\pm$ 3.1 | 97.7 $\pm$ 0.9  | 102.5 $\pm$ 2.3 | 100.3 $\pm$ 2.8 |
| <b>MGDG</b> ( $\mu$ g/mL) | 102.1 $\pm$ 2.6                        | 99.6 $\pm$ 2.3 | 102.3 $\pm$ 1.5 | 100.3 $\pm$ 3.7 | 99.5 $\pm$ 1.9  |
